# Supplementary material
Source: PubMed Central journal article supplement (PMC5695219)
Supplement: NIHMS916753-supplement-Supplementary_Appendix.pdf [file NIHMS916753-supplement-Supplementary_Appendix.pdf]

## Appendix 1. Breakdown of Acute Respiratory Distress Syndrome Rate Calculations by Year

| Year | Number of ARDS Cases (95% CI) | Weighted ARDS cases (95% CI) | Number of live births in USA | Rate of ARDS (95% CI) |
|------|-------------------------------|------------------------------|------------------------------|-----------------------|
| 2006 | 320 (286-357)                 | 1556 (1413-1699)             | 4,265,555                    | 37.5 (33.5-41.8)      |
| 2007 | 363 (327-402)                 | 1776 (1622-1930)             | 4,316,233                    | 42.1 (37.8-46.6)      |
| 2008 | 373 (336-413)                 | 1804 (1635-1973)             | 4,247,694                    | 43.9 (39.5-48.6)      |
| 2009 | 432 (392-475)                 | 2134 (1961-2307)             | 4,130,665                    | 52.3 (47.4-57.5)      |
| 2010 | 398 (359-439)                 | 2006 (1835-2177)             | 3,999,386                    | 49.8 (44.9-54.9)      |
| 2011 | 451 (410-495)                 | 2142 (1949-2335)             | 3,953,590                    | 57.0 (51.9-62.6)      |
| 2012 | 471 (429-516)                 | 2355 (2281-2429)             | 3,952,841                    | 59.6 (54.3-65.3)      |

Rush B, Martinka P, Kilb B, McDermid R, Boyd J, Celi LA. Acute respiratory distress syndrome in pregnant women. *Obstet Gynecol* 2017; 129.

The authors provided this information as a supplement to their article.
